# Supplementary material for: Outcomes and practice patterns with hemodiafiltration in Shanghai: a longitudinal cohort study
Source: PubMed Central journal article supplement (PMC6359843; doi:10.1186/s12882-019-1219-z), 2019-02-01

Figure S2: Full competing risks main-effects model, fully adjusted for the main effects confounders listed in Table 1 (the marker represents point estimates, the whiskers, 95% confidence intervals). Abbreviations: HDF, hemodiafiltration; HB, hemoglobin; BMI, body mass index; eGFR, estimated glomerular filtration rate; RRT, renal replacement therapy; AV, arteriovenous; IDWG, inter-dialytic weight gain.

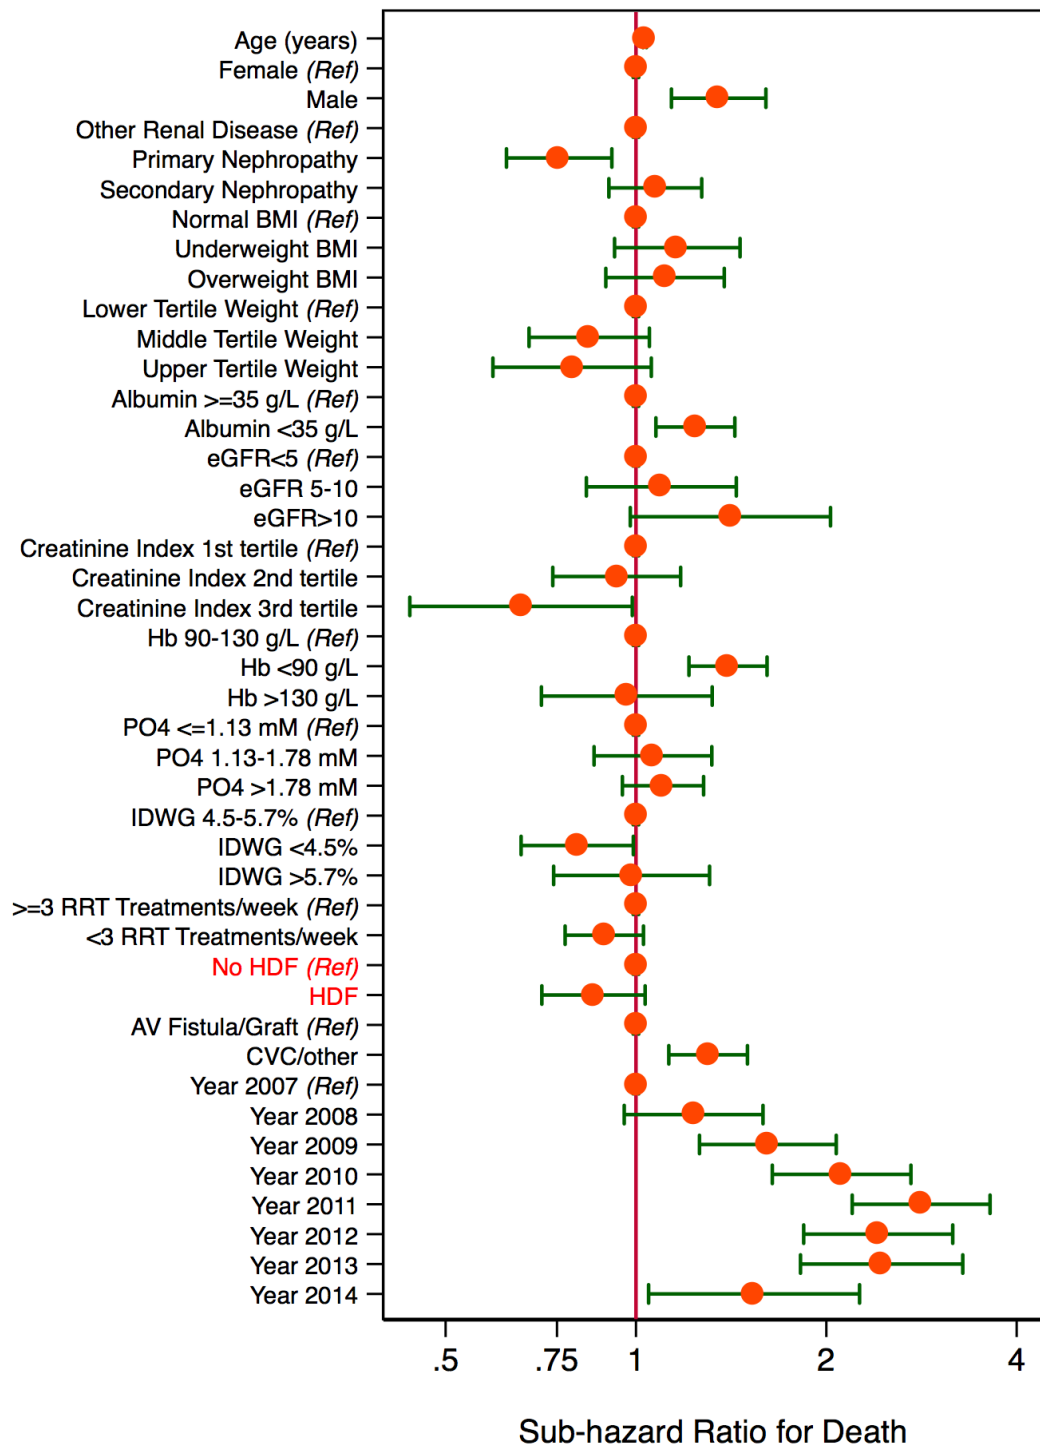

Supplement: 12882_2019_1219_MOESM4_ESM.pdf [file 12882_2019_1219_MOESM4_ESM.pdf]
