# Supplementary material for: Outcomes and practice patterns with hemodiafiltration in Shanghai: a longitudinal cohort study
Source: Springer Nature journal article supplement (doi:10.1186/s12882-019-1219-z), 2019-02-01
Supplement: MOESM1 [file 16437660]

**Table S1.**

*Patient characteristics at renal replacement therapy (RRT) inception, comparing the included and excluded cohorts. All results are presented as median (interquartile range) or n(%).*

|                          |                | Excluded dataset  | Included dataset  | Cohen's d / Cohen's w | Missing data from excluded dataset | Missing data from included dataset |
|--------------------------|----------------|-------------------|-------------------|-----------------------|------------------------------------|------------------------------------|
| N                        |                | 5,590             | 9,351             |                       |                                    |                                    |
| Age (years)              |                | 58 (45, 71)       | 58 (47, 71)       | not applicable        | 3,584 (64)                         | 0 (0)                              |
| Gender*                  | Male           | 1,263 (63%)       | 5,613 (60%)       | 0.02                  | 3,584 (64)                         | 0 (0)                              |
|                          | Female         | 743 (37%)         | 3,738 (40%)       |                       |                                    |                                    |
| Cause of ESKF*           | Primary        | 625 (31%)         | 3,892 (42%)       | 0.06                  | 3,584 (64)                         | 0 (0)                              |
|                          | Secondary      | 1774 (36%)        | 3,472 (37%)       |                       |                                    |                                    |
|                          | Other          | 536 (27%)         | 1,987 (21%)       |                       |                                    |                                    |
| BMI (kg/m <sup>2</sup> ) |                | 22.1 (20.0, 24.4) | 22.2 (20.0, 24.7) | not applicable        | 4,897 (88)                         | 2,811 (30)                         |
| Weight (kg)              |                | 61.8 (54, 68.9)   | 61.6 (53.8, 69.6) | not applicable        | 4,523 (81)                         | 1,892 (20)                         |
| Height (m)               |                | 1.66 (1.60, 1.72) | 1.67 (1.60, 1.72) | not applicable        | 4,897 (88)                         | 2,813 (30)                         |
| Hemoglobin (g/L)         |                | 94 (79, 109)      | 98 (82, 111)      | 0.11                  | 1,522 (27)                         | 827 (9)                            |
| Creatinine (umol/L)      |                | 863 (661, 1088)   | 885 (692, 1096)   | not applicable        | 4,906 (88)                         | 3,518 (38)                         |
| Albumin (g/L)*           |                | 35 (31, 39)       | 36.2 (32.0, 40.3) | 0.16                  | 1,974 (35)                         | 1,236 (13)                         |
| Total Cholesterol (mM)*  |                | 4.1 (3.4, 4.8)    | 4.0 (3.3, 4.7)    | 0.08                  | 4,259 (76)                         | 2,189 (23)                         |
| Unadjusted Calcium*      |                | 2.18 (2, 2.35)    | 2.21 (2.05, 2.39) | 0.18                  | 1,673 (30)                         | 1,141 (12)                         |
| PO4 (mM)*                |                | 1.69 (1.35, 2.10) | 1.78 (1.4, 2.23)  | 0.14                  | 1,691 (30)                         | 1,184 (13)                         |
| Frequency of RRT*        | <3 x week      | 164 (3%)          | 2,721 (29%)       | 0.32                  | 0 (0)                              | 0 (0)                              |
|                          | >=3 x week RRT | 5,426 (97%)       | 6,630 (71%)       |                       |                                    |                                    |
| Kt/V                     |                | 1.29 (1.11, 1.5)  | 1.3 (1.11, 1.54)  | not applicable        | 4,947 (89)                         | 3,999 (43)                         |
| IDWG (%)*                |                | 3.2 (1.9, 4.4)    | 3.4 (2, 4.5)      | 0.03                  | 4,654 (83)                         | 2,431 (26)                         |
| Hemodiafiltration        |                | 104 (20%)         | 2144 (23%)        | not applicable        | 5,065 (91)                         | 0 (0)                              |
| Hemoperfusion            |                | 17 (3%)           | 165 (2%)          | 0.02                  | 5,065 (91)                         | 0 (0)                              |

|                  |         |           |             |     |            |         |
|------------------|---------|-----------|-------------|-----|------------|---------|
| Vascular access* | AVF/AVG | 458 (38%) | 4,653 (53%) | 0.1 | 4,384 (78) | 516 (6) |
|                  | Other   | 748 (62%) | 4,182 (47%) |     |            |         |

Abbreviations: ESKF, end-stage kidney failure; BMI, body mass index; HDF, hemodiafiltration; HP, hemoperfusion; IDWG, inter-dialytic weight gain; RRT, renal replacement therapy; AVF, arteriovenous fistula; AVG, arteriovenous (prosthetic bridge) graft

\* P<0.05
