# Supplementary material for: Outcomes and practice patterns with hemodiafiltration in Shanghai: a longitudinal cohort study
Source: Springer Nature journal article supplement (doi:10.1186/s12882-019-1219-z), 2019-02-01
Supplement: MOESM2 [file 16437660]

```

name: <unnamed>
log: /Users/markmarshall/Dropbox/SRRN/Manuscript/appendix1.smcl
log type: smcl
opened on: 24 Jul 2015, 11:15:13

```

```

1 .
2 . mi xeq: summ bmi alb tot_chol totalcalcium po4 hb pre_d_wt creat KtV per

```

*m=0* data:

```
-> summ bmi alb tot_chol totalcalcium po4 hb pre_d_wt creat KtV per
```

| Variable     | Obs  | Mean     | Std. Dev. | Min       | Max      |
|--------------|------|----------|-----------|-----------|----------|
| bmi          | 6540 | 22.54913 | 3.665202  | 10.47     | 46.02    |
| alb          | 8115 | 35.86079 | 6.423378  | 11        | 57       |
| tot_chol     | 7162 | 4.110973 | 1.151236  | .56       | 15.01    |
| totalcalcium | 8210 | 2.227322 | .2855613  | 1.07      | 3.47     |
| po4          | 8167 | 1.869253 | .6749525  | .4        | 5.83     |
| hb           | 8524 | 96.53156 | 21.78419  | 10        | 187      |
| pre_d_wt     | 7459 | 62.42791 | 12.17227  | 21.3      | 138.4    |
| creat        | 5833 | 903.7147 | 303.5485  | 104       | 2471     |
| KtV          | 5352 | 1.338275 | .3510049  | .4        | 2.96     |
| per          | 6920 | 3.27763  | 1.882586  | -11.58392 | 11.20944 |

*m=1* data:

```
-> summ bmi alb tot_chol totalcalcium po4 hb pre_d_wt creat KtV per
```

| Variable     | Obs  | Mean     | Std. Dev. | Min       | Max      |
|--------------|------|----------|-----------|-----------|----------|
| bmi          | 9351 | 22.556   | 3.663938  | 10.47     | 46.02    |
| alb          | 9351 | 35.77099 | 6.38516   | 11        | 57       |
| tot_chol     | 9351 | 4.106025 | 1.160547  | .56       | 15.01    |
| totalcalcium | 9351 | 2.225304 | .2835358  | 1.07      | 3.47     |
| po4          | 9351 | 1.863746 | .6719348  | .4        | 5.83     |
| hb           | 9351 | 96.29978 | 21.79526  | 10        | 187      |
| pre_d_wt     | 9351 | 62.34796 | 12.1722   | 21.3      | 138.4    |
| creat        | 9351 | 901.5938 | 306.7642  | 104       | 2471     |
| KtV          | 9351 | 1.311041 | .3484043  | .4        | 2.96     |
| per          | 9351 | 3.248563 | 1.894263  | -11.58392 | 11.20944 |

*m=2* data:

```
-> summ bmi alb tot_chol totalcalcium po4 hb pre_d_wt creat KtV per
```

| Variable     | Obs  | Mean     | Std. Dev. | Min   | Max   |
|--------------|------|----------|-----------|-------|-------|
| bmi          | 9351 | 22.57145 | 3.667878  | 10.47 | 46.02 |
| alb          | 9351 | 35.76925 | 6.440603  | 11    | 57    |
| tot_chol     | 9351 | 4.115149 | 1.160475  | .56   | 15.01 |
| totalcalcium | 9351 | 2.226458 | .2850475  | 1.07  | 3.47  |
| po4          | 9351 | 1.865383 | .6744759  | .4    | 5.83  |

|          |      |          |          |           |          |
|----------|------|----------|----------|-----------|----------|
| hb       | 9351 | 96.37526 | 21.77429 | 10        | 187      |
| pre_d_wt | 9351 | 62.36245 | 12.1726  | 21.3      | 138.4    |
| creat    | 9351 | 902.3062 | 305.5148 | 104       | 2471     |
| KtV      | 9351 | 1.309344 | .348188  | .4        | 2.96     |
| per      | 9351 | 3.227478 | 1.891966 | -11.58392 | 11.20944 |

m=3 data:

-> summ bmi alb tot\_chol totalcalcium po4 hb pre\_d\_wt creat KtV per

| Variable     | Obs  | Mean     | Std. Dev. | Min       | Max      |
|--------------|------|----------|-----------|-----------|----------|
| bmi          | 9351 | 22.55779 | 3.693098  | 10.47     | 46.02    |
| alb          | 9351 | 35.80256 | 6.422867  | 11        | 57       |
| tot_chol     | 9351 | 4.112422 | 1.155712  | .56       | 15.01    |
| totalcalcium | 9351 | 2.225774 | .2839098  | 1.07      | 3.47     |
| po4          | 9351 | 1.86321  | .6740408  | .4        | 5.83     |
| hb           | 9351 | 96.38192 | 21.73861  | 10        | 187      |
| pre_d_wt     | 9351 | 62.35496 | 12.22204  | 21.3      | 138.4    |
| creat        | 9351 | 901.9314 | 305.8412  | 104       | 2471     |
| KtV          | 9351 | 1.307503 | .3515729  | .4        | 2.96     |
| per          | 9351 | 3.237585 | 1.881957  | -11.58392 | 11.20944 |

m=4 data:

-> summ bmi alb tot\_chol totalcalcium po4 hb pre\_d\_wt creat KtV per

| Variable     | Obs  | Mean     | Std. Dev. | Min       | Max      |
|--------------|------|----------|-----------|-----------|----------|
| bmi          | 9351 | 22.5669  | 3.653953  | 10.47     | 46.02    |
| alb          | 9351 | 35.77839 | 6.4074    | 11        | 57       |
| tot_chol     | 9351 | 4.106101 | 1.154706  | .56       | 15.01    |
| totalcalcium | 9351 | 2.228024 | .2851763  | 1.07      | 3.47     |
| po4          | 9351 | 1.865205 | .6724103  | .4        | 5.83     |
| hb           | 9351 | 96.34704 | 21.90398  | 10        | 187      |
| pre_d_wt     | 9351 | 62.42336 | 12.12095  | 21.3      | 138.4    |
| creat        | 9351 | 904.4989 | 303.0878  | 104       | 2471     |
| KtV          | 9351 | 1.31228  | .350131   | .4        | 2.96     |
| per          | 9351 | 3.222661 | 1.883238  | -11.58392 | 11.20944 |

m=5 data:

-> summ bmi alb tot\_chol totalcalcium po4 hb pre\_d\_wt creat KtV per

| Variable     | Obs  | Mean     | Std. Dev. | Min   | Max   |
|--------------|------|----------|-----------|-------|-------|
| bmi          | 9351 | 22.56642 | 3.678952  | 10.47 | 46.02 |
| alb          | 9351 | 35.80102 | 6.405659  | 11    | 57    |
| tot_chol     | 9351 | 4.110641 | 1.160171  | .56   | 15.01 |
| totalcalcium | 9351 | 2.227844 | .2851003  | 1.07  | 3.47  |
| po4          | 9351 | 1.863443 | .6729622  | .4    | 5.83  |
| hb           | 9351 | 96.33983 | 21.82927  | 10    | 187   |

|          |      |          |          |           |          |
|----------|------|----------|----------|-----------|----------|
| pre_d_wt | 9351 | 62.37936 | 12.19406 | 21.3      | 138.4    |
| creat    | 9351 | 904.0697 | 305.4299 | 104       | 2471     |
| KtV      | 9351 | 1.312621 | .3497305 | .4        | 2.96     |
| per      | 9351 | 3.235625 | 1.896368 | -11.58392 | 11.20944 |

m=6 data:

-> **summ bmi alb tot\_chol totalcalcium po4 hb pre\_d\_wt creat KtV per**

| Variable     | Obs  | Mean     | Std. Dev. | Min       | Max      |
|--------------|------|----------|-----------|-----------|----------|
| bmi          | 9351 | 22.54483 | 3.686111  | 10.47     | 46.02    |
| alb          | 9351 | 35.83733 | 6.448454  | 11        | 57       |
| tot_chol     | 9351 | 4.104771 | 1.153079  | .56       | 15.01    |
| totalcalcium | 9351 | 2.226039 | .2844286  | 1.07      | 3.47     |
| po4          | 9351 | 1.863208 | .6763725  | .4        | 5.83     |
| hb           | 9351 | 96.31957 | 21.85859  | 10        | 187      |
| pre_d_wt     | 9351 | 62.24581 | 12.16774  | 21.3      | 138.4    |
| creat        | 9351 | 898.1337 | 300.2103  | 104       | 2471     |
| KtV          | 9351 | 1.313078 | .3485768  | .4        | 2.96     |
| per          | 9351 | 3.248965 | 1.889511  | -11.58392 | 11.20944 |

m=7 data:

-> **summ bmi alb tot\_chol totalcalcium po4 hb pre\_d\_wt creat KtV per**

| Variable     | Obs  | Mean     | Std. Dev. | Min       | Max      |
|--------------|------|----------|-----------|-----------|----------|
| bmi          | 9351 | 22.53272 | 3.677953  | 10.47     | 46.02    |
| alb          | 9351 | 35.75447 | 6.440467  | 11        | 57       |
| tot_chol     | 9351 | 4.105849 | 1.148643  | .56       | 15.01    |
| totalcalcium | 9351 | 2.226259 | .2851009  | 1.07      | 3.47     |
| po4          | 9351 | 1.867211 | .6718863  | .4        | 5.83     |
| hb           | 9351 | 96.52859 | 21.7677   | 10        | 187      |
| pre_d_wt     | 9351 | 62.25696 | 12.09774  | 21.3      | 138.4    |
| creat        | 9351 | 899.6177 | 301.664   | 104       | 2471     |
| KtV          | 9351 | 1.31498  | .3498772  | .4        | 2.96     |
| per          | 9351 | 3.234503 | 1.883772  | -11.58392 | 11.20944 |

m=8 data:

-> **summ bmi alb tot\_chol totalcalcium po4 hb pre\_d\_wt creat KtV per**

| Variable     | Obs  | Mean     | Std. Dev. | Min   | Max   |
|--------------|------|----------|-----------|-------|-------|
| bmi          | 9351 | 22.55223 | 3.686109  | 10.47 | 46.02 |
| alb          | 9351 | 35.80606 | 6.438991  | 11    | 57    |
| tot_chol     | 9351 | 4.100273 | 1.155803  | .56   | 15.01 |
| totalcalcium | 9351 | 2.226535 | .2853106  | 1.07  | 3.47  |
| po4          | 9351 | 1.868078 | .6736903  | .4    | 5.83  |
| hb           | 9351 | 96.32368 | 21.78578  | 10    | 187   |
| pre_d_wt     | 9351 | 62.32573 | 12.19885  | 21.3  | 138.4 |
| creat        | 9351 | 899.6589 | 304.6795  | 104   | 2471  |

|     |      |          |          |           |          |
|-----|------|----------|----------|-----------|----------|
| KtV | 9351 | 1.318117 | .3519594 | .4        | 2.96     |
| per | 9351 | 3.250323 | 1.87169  | -11.58392 | 11.20944 |

m=9 data:

-> **summ bmi alb tot\_chol totalcalcium po4 hb pre\_d\_wt creat KtV per**

| Variable     | Obs  | Mean     | Std. Dev. | Min       | Max      |
|--------------|------|----------|-----------|-----------|----------|
| bmi          | 9351 | 22.52545 | 3.68337   | 10.47     | 46.02    |
| alb          | 9351 | 35.82099 | 6.458985  | 11        | 57       |
| tot_chol     | 9351 | 4.098799 | 1.151762  | .56       | 15.01    |
| totalcalcium | 9351 | 2.226636 | .2844736  | 1.07      | 3.47     |
| po4          | 9351 | 1.869351 | .6749128  | .4        | 5.83     |
| hb           | 9351 | 96.25351 | 21.90073  | 10        | 187      |
| pre_d_wt     | 9351 | 62.24626 | 12.17812  | 21.3      | 138.4    |
| creat        | 9351 | 891.8691 | 307.1837  | 104       | 2471     |
| KtV          | 9351 | 1.302963 | .3512762  | .4        | 2.96     |
| per          | 9351 | 3.239481 | 1.890999  | -11.58392 | 11.20944 |

m=10 data:

-> **summ bmi alb tot\_chol totalcalcium po4 hb pre\_d\_wt creat KtV per**

| Variable     | Obs  | Mean     | Std. Dev. | Min       | Max      |
|--------------|------|----------|-----------|-----------|----------|
| bmi          | 9351 | 22.50153 | 3.666376  | 10.47     | 46.02    |
| alb          | 9351 | 35.76271 | 6.447166  | 11        | 57       |
| tot_chol     | 9351 | 4.112494 | 1.157818  | .56       | 15.01    |
| totalcalcium | 9351 | 2.225486 | .2851898  | 1.07      | 3.47     |
| po4          | 9351 | 1.865649 | .6765171  | .4        | 5.83     |
| hb           | 9351 | 96.38995 | 21.90939  | 10        | 187      |
| pre_d_wt     | 9351 | 62.21339 | 12.14194  | 21.3      | 138.4    |
| creat        | 9351 | 900.622  | 304.3301  | 104       | 2471     |
| KtV          | 9351 | 1.3107   | .3561082  | .4        | 2.96     |
| per          | 9351 | 3.256491 | 1.889033  | -11.58392 | 11.20944 |

m=11 data:

-> **summ bmi alb tot\_chol totalcalcium po4 hb pre\_d\_wt creat KtV per**

| Variable     | Obs  | Mean     | Std. Dev. | Min       | Max      |
|--------------|------|----------|-----------|-----------|----------|
| bmi          | 9351 | 22.57419 | 3.652075  | 10.47     | 46.02    |
| alb          | 9351 | 35.82146 | 6.400494  | 11        | 57       |
| tot_chol     | 9351 | 4.120359 | 1.155184  | .56       | 15.01    |
| totalcalcium | 9351 | 2.226003 | .2834779  | 1.07      | 3.47     |
| po4          | 9351 | 1.86933  | .6748425  | .4        | 5.83     |
| hb           | 9351 | 96.40662 | 21.71819  | 10        | 187      |
| pre_d_wt     | 9351 | 62.37766 | 12.20578  | 21.3      | 138.4    |
| creat        | 9351 | 898.0257 | 308.5187  | 104       | 2471     |
| KtV          | 9351 | 1.310586 | .3500207  | .4        | 2.96     |
| per          | 9351 | 3.237837 | 1.898509  | -11.58392 | 11.20944 |

m=12 data:

-> **summ bmi alb tot\_chol totalcalcium po4 hb pre\_d\_wt creat KtV per**

| Variable     | Obs  | Mean     | Std. Dev. | Min       | Max      |
|--------------|------|----------|-----------|-----------|----------|
| bmi          | 9351 | 22.56545 | 3.658881  | 10.47     | 46.02    |
| alb          | 9351 | 35.776   | 6.454754  | 11        | 57       |
| tot_chol     | 9351 | 4.105501 | 1.153238  | .56       | 15.01    |
| totalcalcium | 9351 | 2.226091 | .2830665  | 1.07      | 3.47     |
| po4          | 9351 | 1.865024 | .6750385  | .4        | 5.83     |
| hb           | 9351 | 96.36171 | 21.77535  | 10        | 187      |
| pre_d_wt     | 9351 | 62.34121 | 12.16249  | 21.3      | 138.4    |
| creat        | 9351 | 895.1562 | 305.0878  | 104       | 2471     |
| KtV          | 9351 | 1.312217 | .3515409  | .4        | 2.96     |
| per          | 9351 | 3.242331 | 1.89596   | -11.58392 | 11.20944 |

m=13 data:

-> **summ bmi alb tot\_chol totalcalcium po4 hb pre\_d\_wt creat KtV per**

| Variable     | Obs  | Mean     | Std. Dev. | Min       | Max      |
|--------------|------|----------|-----------|-----------|----------|
| bmi          | 9351 | 22.56779 | 3.681538  | 10.47     | 46.02    |
| alb          | 9351 | 35.7944  | 6.42771   | 11        | 57       |
| tot_chol     | 9351 | 4.098636 | 1.143699  | .56       | 15.01    |
| totalcalcium | 9351 | 2.226474 | .2849409  | 1.07      | 3.47     |
| po4          | 9351 | 1.859603 | .6732934  | .4        | 5.83     |
| hb           | 9351 | 96.29529 | 21.82028  | 10        | 187      |
| pre_d_wt     | 9351 | 62.32793 | 12.14438  | 21.3      | 138.4    |
| creat        | 9351 | 899.4627 | 303.2246  | 104       | 2471     |
| KtV          | 9351 | 1.315179 | .3505051  | .4        | 2.96     |
| per          | 9351 | 3.25002  | 1.875526  | -11.58392 | 11.20944 |

m=14 data:

-> **summ bmi alb tot\_chol totalcalcium po4 hb pre\_d\_wt creat KtV per**

| Variable     | Obs  | Mean     | Std. Dev. | Min       | Max      |
|--------------|------|----------|-----------|-----------|----------|
| bmi          | 9351 | 22.53021 | 3.689616  | 10.47     | 46.02    |
| alb          | 9351 | 35.80452 | 6.432571  | 11        | 57       |
| tot_chol     | 9351 | 4.106324 | 1.150554  | .56       | 15.01    |
| totalcalcium | 9351 | 2.225081 | .2842888  | 1.07      | 3.47     |
| po4          | 9351 | 1.862754 | .6728443  | .4        | 5.83     |
| hb           | 9351 | 96.42768 | 21.76221  | 10        | 187      |
| pre_d_wt     | 9351 | 62.24457 | 12.18611  | 21.3      | 138.4    |
| creat        | 9351 | 904.6246 | 303.5673  | 104       | 2471     |
| KtV          | 9351 | 1.311751 | .3492853  | .4        | 2.96     |
| per          | 9351 | 3.255647 | 1.886973  | -11.58392 | 11.20944 |

m=15 data:

-> `summ bmi alb tot_chol totalcalcium po4 hb pre_d_wt creat KtV per`

| Variable     | Obs  | Mean     | Std. Dev. | Min       | Max      |
|--------------|------|----------|-----------|-----------|----------|
| bmi          | 9351 | 22.53629 | 3.644038  | 10.47     | 46.02    |
| alb          | 9351 | 35.79241 | 6.431524  | 11        | 57       |
| tot_chol     | 9351 | 4.11328  | 1.147397  | .56       | 15.01    |
| totalcalcium | 9351 | 2.226404 | .2851723  | 1.07      | 3.47     |
| po4          | 9351 | 1.863868 | .6765802  | .4        | 5.83     |
| hb           | 9351 | 96.44574 | 21.81301  | 10        | 187      |
| pre_d_wt     | 9351 | 62.2651  | 12.09914  | 21.3      | 138.4    |
| creat        | 9351 | 898.6741 | 303.8313  | 104       | 2471     |
| KtV          | 9351 | 1.311039 | .3520433  | .4        | 2.96     |
| per          | 9351 | 3.227893 | 1.882465  | -11.58392 | 11.20944 |

m=16 data:

-> `summ bmi alb tot_chol totalcalcium po4 hb pre_d_wt creat KtV per`

| Variable     | Obs  | Mean     | Std. Dev. | Min       | Max      |
|--------------|------|----------|-----------|-----------|----------|
| bmi          | 9351 | 22.54433 | 3.708164  | 10.47     | 46.02    |
| alb          | 9351 | 35.8029  | 6.42912   | 11        | 57       |
| tot_chol     | 9351 | 4.109556 | 1.151241  | .56       | 15.01    |
| totalcalcium | 9351 | 2.228944 | .2836     | 1.07      | 3.47     |
| po4          | 9351 | 1.864969 | .6743188  | .4        | 5.83     |
| hb           | 9351 | 96.30773 | 21.77041  | 10        | 187      |
| pre_d_wt     | 9351 | 62.30401 | 12.18934  | 21.3      | 138.4    |
| creat        | 9351 | 898.9772 | 305.3022  | 104       | 2471     |
| KtV          | 9351 | 1.316223 | .3471549  | .4        | 2.96     |
| per          | 9351 | 3.239908 | 1.880549  | -11.58392 | 11.20944 |

m=17 data:

-> `summ bmi alb tot_chol totalcalcium po4 hb pre_d_wt creat KtV per`

| Variable     | Obs  | Mean     | Std. Dev. | Min       | Max      |
|--------------|------|----------|-----------|-----------|----------|
| bmi          | 9351 | 22.54163 | 3.674451  | 10.47     | 46.02    |
| alb          | 9351 | 35.77254 | 6.452571  | 11        | 57       |
| tot_chol     | 9351 | 4.112021 | 1.152516  | .56       | 15.01    |
| totalcalcium | 9351 | 2.226579 | .2841769  | 1.07      | 3.47     |
| po4          | 9351 | 1.862923 | .6710306  | .4        | 5.83     |
| hb           | 9351 | 96.36482 | 21.86602  | 10        | 187      |
| pre_d_wt     | 9351 | 62.32854 | 12.17143  | 21.3      | 138.4    |
| creat        | 9351 | 903.1272 | 304.6748  | 104       | 2471     |
| KtV          | 9351 | 1.309188 | .3473194  | .4        | 2.96     |
| per          | 9351 | 3.237986 | 1.892096  | -11.58392 | 11.20944 |

m=18 data:

-> `summ bmi alb tot_chol totalcalcium po4 hb pre_d_wt creat KtV per`

| Variable     | Obs  | Mean     | Std. Dev. | Min       | Max      |
|--------------|------|----------|-----------|-----------|----------|
| bmi          | 9351 | 22.54871 | 3.643742  | 10.47     | 46.02    |
| alb          | 9351 | 35.79393 | 6.425428  | 11        | 57       |
| tot_chol     | 9351 | 4.095178 | 1.144835  | .56       | 15.01    |
| totalcalcium | 9351 | 2.225549 | .2844612  | 1.07      | 3.47     |
| po4          | 9351 | 1.864318 | .6789322  | .4        | 5.83     |
| hb           | 9351 | 96.3339  | 21.94124  | 10        | 187      |
| pre_d_wt     | 9351 | 62.30692 | 12.11635  | 21.3      | 138.4    |
| creat        | 9351 | 898.4123 | 304.5351  | 104       | 2471     |
| KtV          | 9351 | 1.312685 | .3493088  | .4        | 2.96     |
| per          | 9351 | 3.228534 | 1.879992  | -11.58392 | 11.20944 |

m=19 data:

-> **summ** bmi alb tot\_chol totalcalcium po4 hb pre\_d\_wt creat KtV per

| Variable     | Obs  | Mean     | Std. Dev. | Min       | Max      |
|--------------|------|----------|-----------|-----------|----------|
| bmi          | 9351 | 22.5267  | 3.674979  | 10.47     | 46.02    |
| alb          | 9351 | 35.7512  | 6.437232  | 11        | 57       |
| tot_chol     | 9351 | 4.106363 | 1.152432  | .56       | 15.01    |
| totalcalcium | 9351 | 2.226478 | .2848589  | 1.07      | 3.47     |
| po4          | 9351 | 1.861935 | .6750283  | .4        | 5.83     |
| hb           | 9351 | 96.34514 | 21.80529  | 10        | 187      |
| pre_d_wt     | 9351 | 62.30696 | 12.20241  | 21.3      | 138.4    |
| creat        | 9351 | 896.7303 | 304.8803  | 104       | 2471     |
| KtV          | 9351 | 1.311813 | .3504727  | .4        | 2.96     |
| per          | 9351 | 3.229612 | 1.879888  | -11.58392 | 11.20944 |

m=20 data:

-> **summ** bmi alb tot\_chol totalcalcium po4 hb pre\_d\_wt creat KtV per

| Variable     | Obs  | Mean     | Std. Dev. | Min       | Max      |
|--------------|------|----------|-----------|-----------|----------|
| bmi          | 9351 | 22.59233 | 3.7053    | 10.47     | 46.02    |
| alb          | 9351 | 35.80153 | 6.420536  | 11        | 57       |
| tot_chol     | 9351 | 4.10609  | 1.143563  | .56       | 15.01    |
| totalcalcium | 9351 | 2.225865 | .2847843  | 1.07      | 3.47     |
| po4          | 9351 | 1.861117 | .6741085  | .4        | 5.83     |
| hb           | 9351 | 96.31962 | 21.73306  | 10        | 187      |
| pre_d_wt     | 9351 | 62.39721 | 12.17446  | 21.3      | 138.4    |
| creat        | 9351 | 899.0332 | 305.6105  | 104       | 2471     |
| KtV          | 9351 | 1.321002 | .3524972  | .4        | 2.96     |
| per          | 9351 | 3.228285 | 1.887773  | -11.58392 | 11.20944 |

3 .

4 . mi xeq: tab VA

m=0 data:

-> **tab** VA

| va                          | Freq.        | Percent       | Cum.          |
|-----------------------------|--------------|---------------|---------------|
| AV Fistula/Graft {it:(Ref)} | <b>4,653</b> | <b>52.67</b>  | <b>52.67</b>  |
| CVC/other                   | <b>4,182</b> | <b>47.33</b>  | <b>100.00</b> |
| Total                       | <b>8,835</b> | <b>100.00</b> |               |

*m=1* data:

-> **tab VA**

| va                          | Freq.        | Percent       | Cum.          |
|-----------------------------|--------------|---------------|---------------|
| AV Fistula/Graft {it:(Ref)} | <b>4,904</b> | <b>52.44</b>  | <b>52.44</b>  |
| CVC/other                   | <b>4,447</b> | <b>47.56</b>  | <b>100.00</b> |
| Total                       | <b>9,351</b> | <b>100.00</b> |               |

*m=2* data:

-> **tab VA**

| va                          | Freq.        | Percent       | Cum.          |
|-----------------------------|--------------|---------------|---------------|
| AV Fistula/Graft {it:(Ref)} | <b>4,925</b> | <b>52.67</b>  | <b>52.67</b>  |
| CVC/other                   | <b>4,426</b> | <b>47.33</b>  | <b>100.00</b> |
| Total                       | <b>9,351</b> | <b>100.00</b> |               |

*m=3* data:

-> **tab VA**

| va                          | Freq.        | Percent       | Cum.          |
|-----------------------------|--------------|---------------|---------------|
| AV Fistula/Graft {it:(Ref)} | <b>4,919</b> | <b>52.60</b>  | <b>52.60</b>  |
| CVC/other                   | <b>4,432</b> | <b>47.40</b>  | <b>100.00</b> |
| Total                       | <b>9,351</b> | <b>100.00</b> |               |

*m=4* data:

-> **tab VA**

| va                          | Freq.        | Percent       | Cum.          |
|-----------------------------|--------------|---------------|---------------|
| AV Fistula/Graft {it:(Ref)} | <b>4,919</b> | <b>52.60</b>  | <b>52.60</b>  |
| CVC/other                   | <b>4,432</b> | <b>47.40</b>  | <b>100.00</b> |
| Total                       | <b>9,351</b> | <b>100.00</b> |               |

*m=5* data:

-> **tab VA**

| va | Freq. | Percent | Cum. |
|----|-------|---------|------|
|----|-------|---------|------|



|                             |       |        |        |
|-----------------------------|-------|--------|--------|
| AV Fistula/Graft {it:(Ref)} | 4,926 | 52.68  | 52.68  |
| CVC/other                   | 4,425 | 47.32  | 100.00 |
| Total                       | 9,351 | 100.00 |        |

m=6 data:  
-> **tab VA**

| va                          | Freq. | Percent | Cum.   |
|-----------------------------|-------|---------|--------|
| AV Fistula/Graft {it:(Ref)} | 4,936 | 52.79   | 52.79  |
| CVC/other                   | 4,415 | 47.21   | 100.00 |
| Total                       | 9,351 | 100.00  |        |

m=7 data:  
-> **tab VA**

| va                          | Freq. | Percent | Cum.   |
|-----------------------------|-------|---------|--------|
| AV Fistula/Graft {it:(Ref)} | 4,919 | 52.60   | 52.60  |
| CVC/other                   | 4,432 | 47.40   | 100.00 |
| Total                       | 9,351 | 100.00  |        |

m=8 data:  
-> **tab VA**

| va                          | Freq. | Percent | Cum.   |
|-----------------------------|-------|---------|--------|
| AV Fistula/Graft {it:(Ref)} | 4,924 | 52.66   | 52.66  |
| CVC/other                   | 4,427 | 47.34   | 100.00 |
| Total                       | 9,351 | 100.00  |        |

m=9 data:  
-> **tab VA**

| va                          | Freq. | Percent | Cum.   |
|-----------------------------|-------|---------|--------|
| AV Fistula/Graft {it:(Ref)} | 4,929 | 52.71   | 52.71  |
| CVC/other                   | 4,422 | 47.29   | 100.00 |
| Total                       | 9,351 | 100.00  |        |

m=10 data:  
-> **tab VA**

| va                          | Freq. | Percent | Cum.   |
|-----------------------------|-------|---------|--------|
| AV Fistula/Graft {it:(Ref)} | 4,929 | 52.71   | 52.71  |
| CVC/other                   | 4,422 | 47.29   | 100.00 |

Total | 9,351 100.00

m=11 data:

-> **tab VA**

| va                          | Freq. | Percent | Cum.   |
|-----------------------------|-------|---------|--------|
| AV Fistula/Graft {it:(Ref)} | 4,923 | 52.65   | 52.65  |
| CVC/other                   | 4,428 | 47.35   | 100.00 |
| Total                       | 9,351 | 100.00  |        |

m=12 data:

-> **tab VA**

| va                          | Freq. | Percent | Cum.   |
|-----------------------------|-------|---------|--------|
| AV Fistula/Graft {it:(Ref)} | 4,914 | 52.55   | 52.55  |
| CVC/other                   | 4,437 | 47.45   | 100.00 |
| Total                       | 9,351 | 100.00  |        |

m=13 data:

-> **tab VA**

| va                          | Freq. | Percent | Cum.   |
|-----------------------------|-------|---------|--------|
| AV Fistula/Graft {it:(Ref)} | 4,921 | 52.63   | 52.63  |
| CVC/other                   | 4,430 | 47.37   | 100.00 |
| Total                       | 9,351 | 100.00  |        |

m=14 data:

-> **tab VA**

| va                          | Freq. | Percent | Cum.   |
|-----------------------------|-------|---------|--------|
| AV Fistula/Graft {it:(Ref)} | 4,927 | 52.69   | 52.69  |
| CVC/other                   | 4,424 | 47.31   | 100.00 |
| Total                       | 9,351 | 100.00  |        |

m=15 data:

-> **tab VA**

| va                          | Freq. | Percent | Cum.   |
|-----------------------------|-------|---------|--------|
| AV Fistula/Graft {it:(Ref)} | 4,952 | 52.96   | 52.96  |
| CVC/other                   | 4,399 | 47.04   | 100.00 |
| Total                       | 9,351 | 100.00  |        |

m=16 data:

-> **tab VA**

| va                          | Freq.        | Percent       | Cum.          |
|-----------------------------|--------------|---------------|---------------|
| AV Fistula/Graft {it:(Ref)} | <b>4,934</b> | <b>52.76</b>  | <b>52.76</b>  |
| CVC/other                   | <b>4,417</b> | <b>47.24</b>  | <b>100.00</b> |
| Total                       | <b>9,351</b> | <b>100.00</b> |               |

m=17 data:

-> **tab VA**

| va                          | Freq.        | Percent       | Cum.          |
|-----------------------------|--------------|---------------|---------------|
| AV Fistula/Graft {it:(Ref)} | <b>4,917</b> | <b>52.58</b>  | <b>52.58</b>  |
| CVC/other                   | <b>4,434</b> | <b>47.42</b>  | <b>100.00</b> |
| Total                       | <b>9,351</b> | <b>100.00</b> |               |

m=18 data:

-> **tab VA**

| va                          | Freq.        | Percent       | Cum.          |
|-----------------------------|--------------|---------------|---------------|
| AV Fistula/Graft {it:(Ref)} | <b>4,904</b> | <b>52.44</b>  | <b>52.44</b>  |
| CVC/other                   | <b>4,447</b> | <b>47.56</b>  | <b>100.00</b> |
| Total                       | <b>9,351</b> | <b>100.00</b> |               |

m=19 data:

-> **tab VA**

| va                          | Freq.        | Percent       | Cum.          |
|-----------------------------|--------------|---------------|---------------|
| AV Fistula/Graft {it:(Ref)} | <b>4,935</b> | <b>52.78</b>  | <b>52.78</b>  |
| CVC/other                   | <b>4,416</b> | <b>47.22</b>  | <b>100.00</b> |
| Total                       | <b>9,351</b> | <b>100.00</b> |               |

m=20 data:

-> **tab VA**

| va                          | Freq.        | Percent       | Cum.          |
|-----------------------------|--------------|---------------|---------------|
| AV Fistula/Graft {it:(Ref)} | <b>4,934</b> | <b>52.76</b>  | <b>52.76</b>  |
| CVC/other                   | <b>4,417</b> | <b>47.24</b>  | <b>100.00</b> |
| Total                       | <b>9,351</b> | <b>100.00</b> |               |

5 .

6 . log close

name: <unnamed>

log: /Users/markmarshall/Dropbox/SRRN/Manuscript/appendix1.smcl

log type: **smcl**  
closed on: **24 Jul 2015, 11:15:17**

---
